# Supplementary material
Source: PubMed Central journal article supplement (PMC1949001)
Supplement: 7601803s1.pdf [file 7601803s1.pdf]

**Deregulation of tumor angiogenesis and blockade  
of tumor growth in PPAR $\beta$  deficient mice**

Sabine Müller-Brüsselbach, Martin Kömhoff, Markus Rieck,  
Wolfgang Meissner, Kerstin Kaddatz, Jürgen Adamkiewicz,  
Boris Keil, Klaus J. Klose, Roland Moll, Andrew D. Burdick,  
Jeffrey M. Peters and Rolf Müller

**Supplemental Figures**

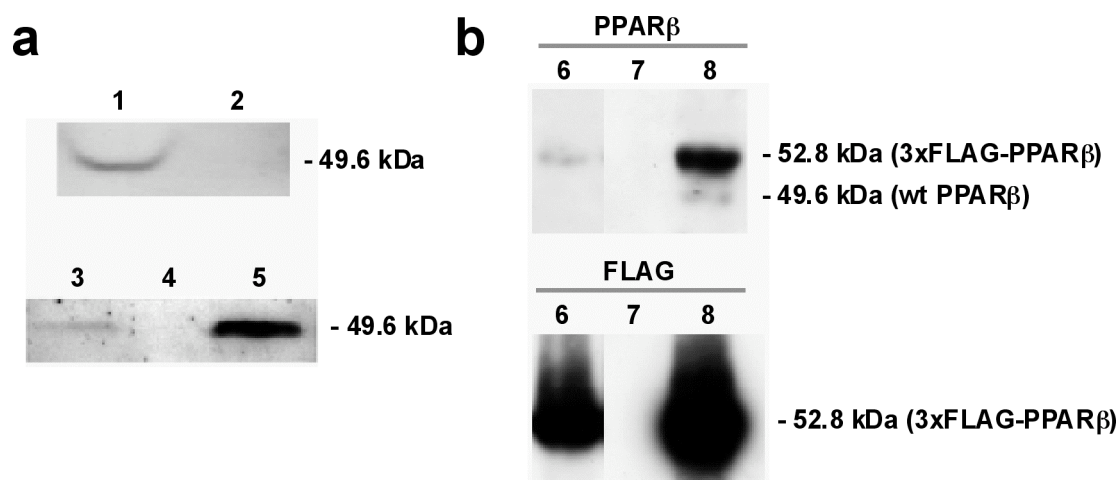

**Figure S1:** Analysis of PPAR $\beta$  expression in cells from *Pparb*<sup>+/+</sup> or *Pparb*<sup>-/-</sup> mice and in retrovirally transduced null fibroblasts. Equal loading was verified by Ponceau S Red staining of the membrane (not shown). The 49.6 kDa and 52.8 kDa bands representing endogenous PPAR $\beta$  and the exogenous 3xFLAG-tagged protein are indicated.

(a) Immunoblot analysis of PPAR $\beta$  expression in fibroblasts (lanes 1 and 2) and aortic ECs (lanes 3-5) established from *Pparb*<sup>+/+</sup> (lanes 1 and 3) or *Pparb*<sup>-/-</sup> mice (lanes 2 and 4) using an antibody directed against the N-terminus of PPAR $\beta$  (SC1987, Santa Cruz). For comparison, cells transiently transfected with a CMV-*PPARb* vector are shown (lane 5).

(b) Immunoblot analysis of null fibroblasts transduced with a retrovirus expressing FLAG-tagged PPAR $\beta$  (3Fb1 cells; lane 6) and control cells harboring the empty retroviral vector (Lpcx cells; lane 7) using antibodies directed against PPAR $\beta$  (as in panel a) or FLAG-tag. For comparison, cells transiently transfected with a CMV promoter driven 3xFLAG-*Pparb* vector are shown (lane 8).

The data show that null cells lack any detectable PPAR $\beta$  protein, whereas PPAR $\beta$  can be readily visualized in 3Fb1 cells.

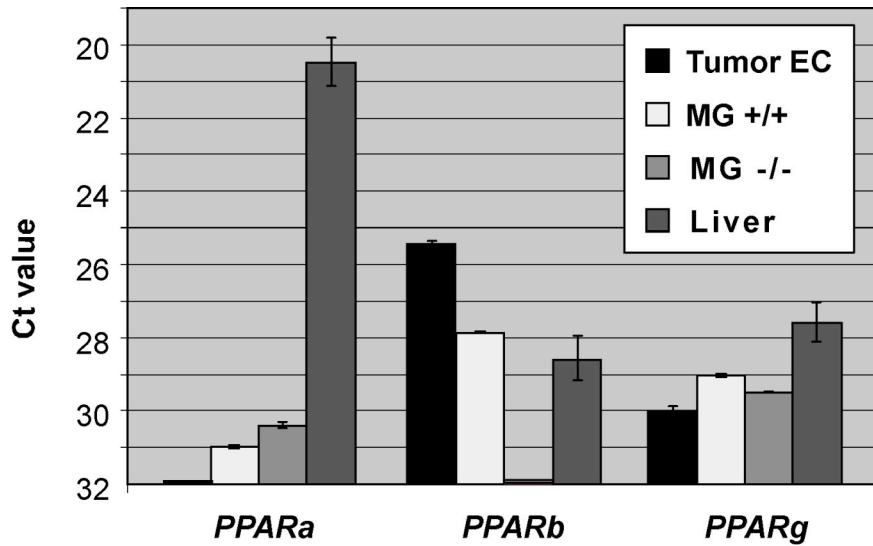

**Figure S2:** Differential mRNA expression of different *Ppar* subtypes in mouse endothelial cells isolated from a subcutaneous tumor, in matrigel-invading cells from *Pparb*<sup>+/+</sup> and *Pparb*<sup>-/-</sup> mice, and in *Pparb*<sup>+/+</sup> mouse liver, determined by qPCR. Values represent Ct values (averages of triplicates ± S.D) normalized to *Arp0*.

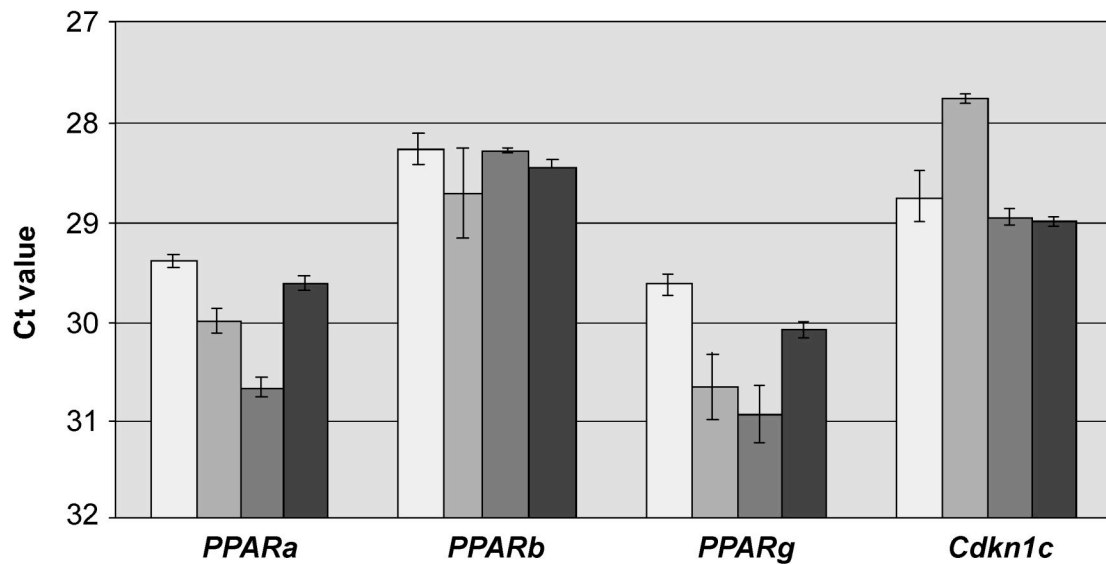

**Figure S3:** Differential mRNA expression of different *Ppar* subtypes and *Cdkn1c* in CD34<sup>+</sup> endothelial cells isolated from human non-small cell lung carcinomas, determined by qPCR. Values represent Ct values (averages of triplicates ± S.D) normalized to *L27*.

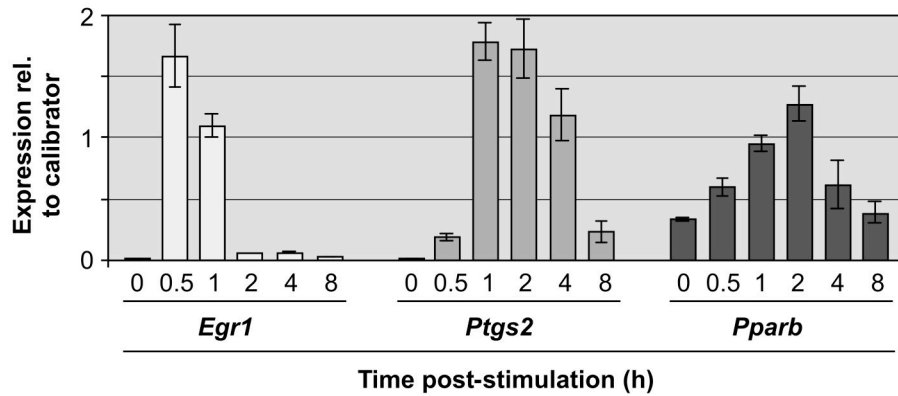

**Figure S4:** Induction of *Pparb* mRNA by angiogenic growth factors in an established mouse aortic EC line. Cells were deprived of growth factors for 5 hrs by incubation in EGM medium lacking FBS, FGF-2, VEGF, IGF-1 and EGF. Cells were then stimulated with complete EGM-2 medium plus additional FGF-2 (100 ng/ml human recombinant FGF-2, Biomol) for the indicated times. RNA levels were quantified by qPCR. Pooled cultured aortic ECs were used as calibrator and *Arp0* as normalizer. Relative expression values represent averages of triplicates  $\pm$  S.D. *Egr-1* and *Ptgs2* were included as genes known to be induced by angiogenic growth factors (Abe and Sato, 2001).

**Reference**

Abe, M. and Sato, Y. (2001) cDNA microarray analysis of the gene expression profile of VEGF-activated human umbilical vein endothelial cells. *Angiogenesis*, **4**, 289-298.

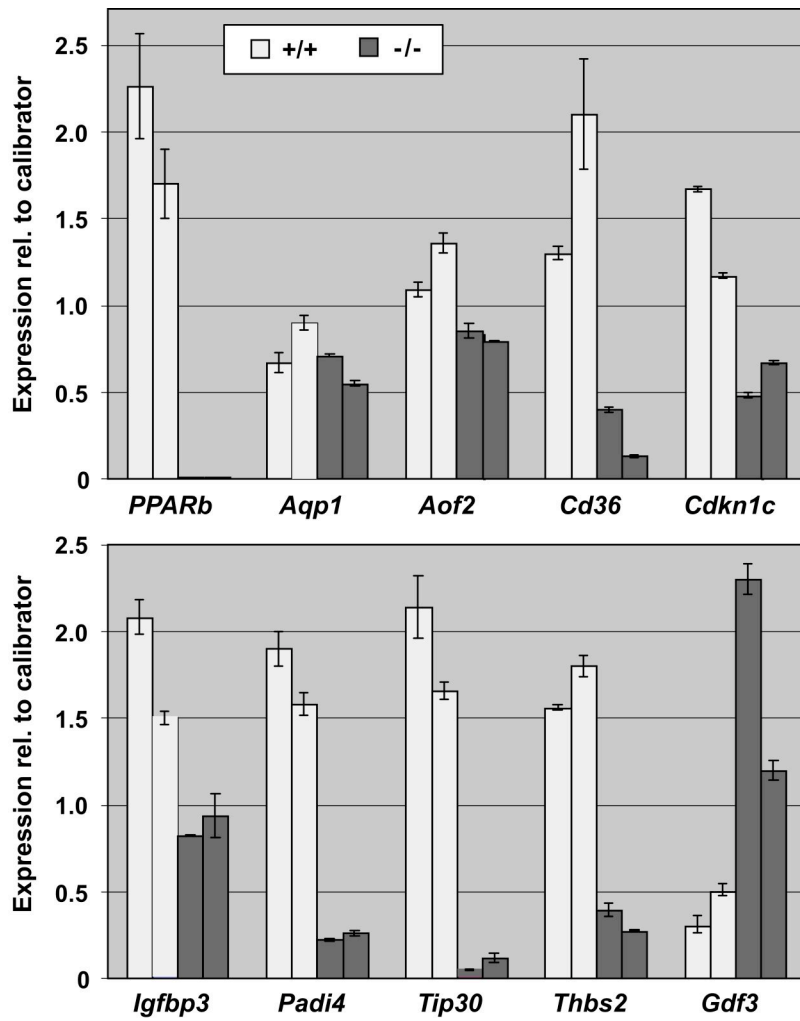

**Figure S5:** Verification of microarray results. Gene expression patterns of matrigel-invading cells from *Pparb*<sup>+/+</sup> and *Pparb*<sup>-/-</sup> mice 3 days after implantation were analyzed by qPCR. Data are shown for 2 individual plugs from each genotype. Data represent relative expression values calibrated with RNA from pooled cultured aortic ECs and normalized to *Arp0* (triplicates ± S.D). The qPCR data confirm the microarray results in Supplemental Table I.

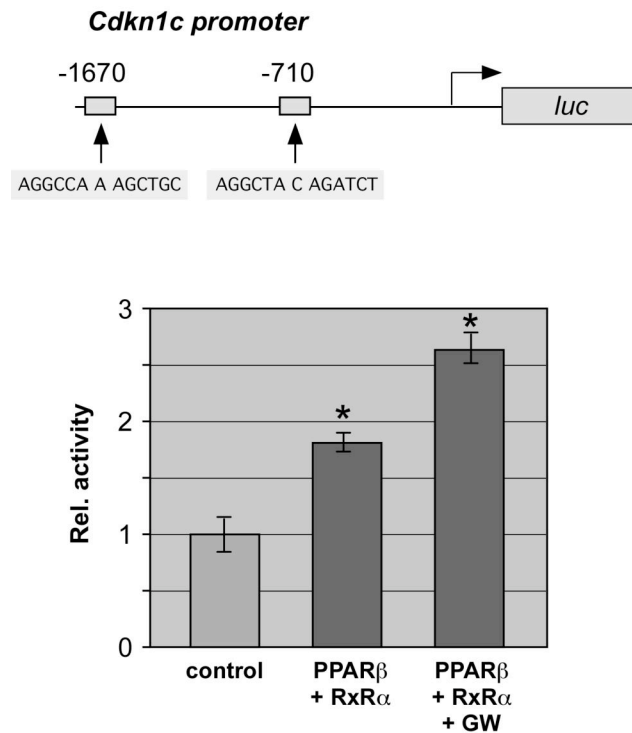

**Figure S6:** Regulation of the murine *Cdkn1c* promoter by PPAR $\beta$ . Two motifs fitting the PPRE consensus sequence were identified at positions –1670 and –710 by Genomatix MatInspector. A 1.7 kb *Cdkn1c* promoter fragment harboring these elements was cloned in front of a luciferase reporter gene and analyzed in the mouse EC line 2H11 (Walter-Yohrling et al., 2004) by transient transfection as described (Fauti et al., 2006). Transfections were performed with 5  $\mu$ g of reporter plasmid and 50 ng of each expression plasmid (PPAR $\beta$ , RxR $\alpha$ ) or empty vector (control). Right-most bar: cells were treated with 1  $\mu$ M GW501516 after transfection. Values indicate RLUs normalized to 1 for control cells (transfected with empty vector only) and represent the mean of triplicates. Error bars show the standard deviation, asterisks denote statistically significant differences relative to the control (t-test;  $P < 0.05$ ).

## References

Fauti, T., Müller-Brusselbach, S., Kreutzer, M., Rieck, M., Meissner, W., Rapp, U., Schweer, H., Komhoff, M. and Müller, R. (2006) Induction of PPAR $\beta$  and prostacyclin (PGI $_2$ ) synthesis by Raf signaling: failure of PGI $_2$  to activate PPAR $\beta$ . *Febs J*, 273, 170-179.

Walter-Yohrling, J., Morgenbesser, S., Rouleau, C., Bagley, R., Callahan, M., Weber, W. and Teicher, B.A. (2004) Murine endothelial cell lines as models of tumor endothelial cells. *Clin Cancer Res*, 10, 2179-2189.
