# Supplementary material
Source: PubMed Central journal article supplement (PMC1949001)
Supplement: 7601803s2.pdf [file 7601803s2.pdf]

**Deregulation of tumor angiogenesis and blockade  
of tumor growth in PPAR $\beta$  deficient mice**

Sabine Müller-Brüsselbach, Martin Kömhoff, Markus Rieck,  
Wolfgang Meissner, Kerstin Kaddatz, Jürgen Adamkiewicz,  
Boris Keil, Klaus J. Klose, Roland Moll, Andrew D. Burdick,  
Jeffrey M. Peters and Rolf Müller

Supplemental Table I

**Table S1:** Microarray analysis of genes differentially expressed at in *Pparb*<sup>-/-</sup> versus *Pparb*<sup>+/+</sup> cells from matrigel plugs. Data have been deposited with the ArrayExpress Database ([www.ebi.ac.uk/arrayexpress](http://www.ebi.ac.uk/arrayexpress); accession number E-MEXP-983). Genes with potential functions in cell cycle control, signal transduction, protein modification or transcription are highlighted.

**A:** Genes expressed at **lower levels in *Pparb*<sup>-/-</sup> versus *Pparb*<sup>+/+</sup> cells.** The first column shows the signal ratio obtained for for *Pparb*<sup>+/+</sup> relative to *Pparb*<sup>-/-</sup> cells.

| wt/null | Gene name                                        | Symbol         | Function                                                           |
|---------|--------------------------------------------------|----------------|--------------------------------------------------------------------|
| 18.5    | TIP30 / CC3 / HIV-1 TAT-interacting protein      | <i>Htatip2</i> | Transcription factor, NADPH-binding                                |
| 17.9    | Clone ID: H3095E04                               | ?              | ?                                                                  |
| 5.6     | Enolase 1-alpha (non-neuron)                     | <i>Eno1</i>    | Glycolytic enzyme                                                  |
| 2.4     | Proprotein convertase subtilisin/kexin type 5    | <i>Pcsk5</i>   | Processing of integrin-alpha subunits                              |
| 2.3     | SCY1-like 2 / CVAK104                            | <i>Scyl2</i>   | Phosphorylation of adaptin in plasma membrane adapter AP2          |
| 2.3     | Nidogen 1                                        | <i>Nid1</i>    | Basement membrane glycoprotein                                     |
| 2.2     | Solute carrier family 40, member 1               | <i>Slc40a1</i> | Iron transport                                                     |
| 2.2     | Lysyl oxidase-like 2                             | <i>Loxl2</i>   | Cross-linking of collagen and elastin                              |
| 2.2     | Ubiquitin carboxy-terminal hydrolase L1          | <i>Uchl1</i>   | Cleavage of C-terminal adducts of ubiquitin to monomers            |
| 2.1     | Pleiomorphic adenoma gene-like 1                 | <i>Plagl1</i>  | Transcription factor; inhibitor of cell proliferation              |
| 2.1     | Peptidyl arginine deiminase type IV              | <i>Padi4</i>   | Transcriptional regulation through histone H3 deimination          |
| 2.1     | Ankyrin repeat and SOCS box-containing protein 4 | <i>Asb4</i>    | Suppressor of cytokine signaling through inhibition of JAK kinases |
| 2.1     | Cysteine dioxygenase 1, cytosolic                | <i>Cdo1</i>    | Cystein metabolism                                                 |
| 2.1     | *Fatty acid binding protein 4, adipocyte         | <i>Fabp4</i>   | Lipid metabolism                                                   |
| 2.1     | SUMO/sentrin specific peptidase 6                | <i>Senp6</i>   | Processing of SUMO1 and other ubiquitin-like molecules             |
| 2.1     | DCP2 decapping enzyme homolog                    | <i>Dcp2</i>    | mRNA decapping prior to degradation                                |
| 2.0     | Transcription elong. factor A (SII), 3 / TFIIS   | <i>Tcea3</i>   | Transcriptional elongation by RNA polymerase II                    |
| 2.0     | *Acyl-CoA dehydrogenase, long-chain              | <i>Acadl</i>   | Lipid metabolism                                                   |
| 2.0     | *Stearoyl-Coenzyme A desaturase 1                | <i>Scd1</i>    | Lipid metabolism                                                   |
| 2.0     | Lipocalin 2                                      | <i>Lcn2</i>    | Iron transport; modulator of inflammation                          |
| 1.9     | Secreted phosphoprotein / Osteopontin            | <i>Spp1</i>    | p53-induced cytokine; tumor suppressor; role in wound healing      |
| 1.9     | Amine oxidase (flavin containing) domain 2       | <i>Aof2</i>    | Transcriptional regulation through histone H3 Lys4 demethylation   |

|     |                                                       |                |                                                                   |
|-----|-------------------------------------------------------|----------------|-------------------------------------------------------------------|
| 1.9 | WNT1 inducible signaling pathway protein 1            | <i>Wisp1</i>   | Connective tissue growth factor                                   |
| 1.9 | HIF prolyl hydroxylase / PHD3 / HIFPH3                | <i>Egln3</i>   | Negative regulator of hypoxia (HIF)-induced transcription         |
| 1.9 | *Thrombospondin receptor / Fatty acid translocase     | <i>Cd36</i>    | Receptor for oxidized LDL, thrombospondins and collagen           |
| 1.9 | Galactosidase, beta 1                                 | <i>Glb1</i>    | Lysosomal enzyme; senescence marker                               |
| 1.9 | Heme oxygenase (decycling) 1                          | <i>Hmox1</i>   | Heme catabolism                                                   |
| 1.9 | Sorbin and SH3 domain containing 1                    | <i>Sorbs1</i>  | Stimulation of adipocytes by insulin; adaptor at insulin receptor |
| 1.9 | Proteasome activator subunit 4                        | <i>Psme4</i>   | Activation of proteasomal hydrolysis of peptides                  |
| 1.8 | Growth factor, erv-like / Augmenter of liver regener. | <i>Gfer</i>    | Growth factor                                                     |
| 1.8 | Insulin-like growth factor binding protein 3          | <i>Igfbp3</i>  | Modulator of IGF activity; inhibitor of cell proliferation        |
| 2.7 | Heparan sulfate 6-O-sulfotransferase 2                | <i>Hs6st2</i>  | Synthesis of heparan sulfates                                     |
| 1.8 | Myosin, light polypeptide 9, regulatory               | <i>My19</i>    | Smooth muscle cell contraction                                    |
| 1.8 | GalNAc transferase 10                                 | <i>Galnt10</i> | Synthesis of mucin-type oligosaccharides                          |
| 1.7 | Thrombospondin-2                                      | <i>Thbs2</i>   | Inhibitor of EC proliferation and modulator of angiogenesis       |
| 1.7 | O-acyltransferase domain containing 5                 | <i>Grcc3f</i>  | Lipid metabolism                                                  |
| 1.7 | Ferritin light chain 1                                | <i>Ftl</i>     | Iron storage                                                      |
| 1.7 | A disintegrin and metallopeptidase domain 8           | <i>Adam8</i>   | Role in cell adhesion                                             |
| 1.7 | Cyclin-dependent kinase inhibitor 1C (p57)            | <i>Cdkn1c</i>  | Cell cycle inhibitor                                              |

\*known PPAR target genes: *Fabp4* (Targett-Adams et al., 2005), *Acadl* (Harano et al., 2006), *Scd1* (Miller and Ntambi, 1996), *Cd36* (Tontonoz et al., 1998).

**B:** Genes expressed at higher levels in *Pparb*<sup>-/-</sup> versus *Pparb*<sup>+/+</sup> cells. The first column shows the signal ratio obtained for *Pparb*<sup>-/-</sup> relative to *Pparb*<sup>+/+</sup> cells.

| null/wt | Gene name                                          | Symbol         | Function                                                                              |
|---------|----------------------------------------------------|----------------|---------------------------------------------------------------------------------------|
| 3.7     | Laminin B1 subunit 1                               | <i>Lamb1-1</i> | Major component of the basal lamina                                                   |
| 3.1     | Erythroid differentiation regulator 1              | <i>Erdr1</i>   | unknown                                                                               |
| 3.0     | DEAD-H box 6 / Oncogene RCK                        | <i>Ddx6</i>    | RNA helicase, putative activator of cell proliferation                                |
| 3.0     | WD repeat and FYVE domain containing 3             | <i>Wdfy3</i>   | $\beta$ -N-acetylglucosaminylglycopeptide $\beta$ -1,4-galactosyltransferase activity |
| 2.8     | Coatamer protein complex, subunit zeta 1           | <i>Copz1</i>   | Protein transporter activity, intracellular protein transport                         |
| 2.4     | R3H domain 1 (binds single-stranded nucleic acids) | <i>R3hdm</i>   | Single-stranded nucleic acid binding protein                                          |
| 2.4     | Myocyte enhancer factor 2C                         | <i>Mef2c</i>   | Myogenic basic helix-loop-helix transcription factor                                  |

|     |                                                          |                |                                                                    |
|-----|----------------------------------------------------------|----------------|--------------------------------------------------------------------|
| 2.3 | MAD homolog 9 / SMAD9                                    | <i>Smad9</i>   | Signal transduction from BMP type 1 receptor                       |
| 2.3 | Gene regulated by estrogen in breast cancer protein      | <i>Greb1</i>   | Hormone-regulated inducer of cell proliferation                    |
| 2.3 | Growth differentiation factor 3                          | <i>Gdf3</i>    | TGF-beta type ligand associated with undifferentiated cells        |
| 2.2 | Solute carrier family 38, member 1                       | <i>Slc38a1</i> | Amino acid transporter                                             |
| 2.1 | Oxidative-stress responsive 1                            | <i>Oxsr1</i>   | Protein kinase                                                     |
| 2.1 | O-linked acetylglucosamine transferase                   | <i>Ogt</i>     | Protein glycosylation                                              |
| 2.0 | Carboxypeptidase E                                       | <i>Cpe</i>     | Processing of prohormone intermediates                             |
| 2.0 | Calmodulin-like 4                                        | <i>Calml4</i>  | Calcium ion binding                                                |
| 1.9 | G protein-coupled receptor 178 ?? Dynein light chain     | <i>Tctex1</i>  | Major microtubular motor protein                                   |
| 1.9 | Apolipoprotein B editing complex 1                       | <i>Apobec1</i> | Switching of apoB-100 to apoB-48 mRNA                              |
| 1.8 | SH3-domain GRB2-like 3 / Endophilin A3                   | <i>Sh3gl3</i>  | Protein interactions (Mta1)                                        |
| 1.8 | ATPase, Ca <sup>++</sup> transporting, plasma membrane 1 | <i>Atp2b1</i>  | ATPase activity, coupled to transmembrane movement of calcium ions |
| 1.8 | FXFD domain-containing ion transport regulator 6         | <i>Fxyd6</i>   | Ion channel activity                                               |
| 1.8 | Copine family member IX                                  | <i>Cpne9</i>   | Calcium-dependent binding of phospholipids                         |
| 1.8 | SAM and SH3 domain containing 1                          | <i>Sash1</i>   | Putative adapter and scaffold protein 1                            |
| 1.7 | Carboxypeptidase A3, mast cell                           | <i>Cpa3</i>    | Carboxypeptidase A activity, metalloproteinase activity            |
| 1.7 | Transcription factor 12                                  | <i>Tcf12</i>   | Regulation of polymerase II transcription, interacts with Th1      |
| 1.7 | Deubiquitinating enzyme 2a                               | <i>Dub2a</i>   | Ubiquitin-specific protease activity                               |
| 1.7 | Leucine-rich repeats & immunoglobulin-like domains 1     | <i>Lrig1</i>   | Transferase activity                                               |

## References

- Harano, Y., Yasui, K., Toyama, T., Nakajima, T., Mitsuyoshi, H., Mimani, M., Hirasawa, T., Itoh, Y. and Okanoue, T. (2006) Fenofibrate, a peroxisome proliferator-activated receptor alpha agonist, reduces hepatic steatosis and lipid peroxidation in fatty liver Shionogi mice with hereditary fatty liver. *Liver Int*, **26**, 613-620.
- Miller, C.W. and Ntambi, J.M. (1996) Peroxisome proliferators induce mouse liver stearoyl-CoA desaturase 1 gene expression. *Proc Natl Acad Sci U S A*, **93**, 9443-9448.
- Targett-Adams, P., McElwee, M.J., Ehrenborg, E., Gustafsson, M.C., Palmer, C.N. and McLauchlan, J. (2005) A PPAR response element regulates transcription of the gene for human adipose differentiation-related protein. *Biochim Biophys Acta*, **1728**, 95-104.
- Tontonoz, P., Nagy, L., Alvarez, J.G., Thomazy, V.A. and Evans, R.M. (1998) PPARgamma promotes monocyte/macrophage differentiation and uptake of oxidized LDL. *Cell*, **93**, 241-252.
